# Supplementary material
Source: PubMed Central journal article supplement (PMC6325187)
Supplement: 63dae78f732eec5ac178e079098c465c_AAC.01923-18-s0001.pdf [file 63dae78f732eec5ac178e079098c465c_AAC.01923-18-s0001.pdf]

## 1 **Supplemental Materials**

2

3 **Nanopore sequencing.** Long-read genomic sequencing was performed using the third  
4 generation Oxford Nanopore MinION Mk1b (Isolates 1-30) and GridION X5 (Isolates 31-40;  
5 Oxford, England) sequencing instruments. Genomic DNA was extracted from pure cultures  
6 using the DNeasy PowerBiofilm Kit (Qiagen, Hilden, Germany). Each Nanopore sequencing  
7 library was prepared using 5 µg of DNA with the 1D ligation kit (SQK-LSK108, Oxford Nanopore  
8 Technologies) using R9.4 flowcells (FLO-MIN106). A single isolate was run per flowcell.  
9 MinKNOW software was used to collect sequencing data. Three separate analysis pipelines  
10 were performed: (1) a real-time Nanopore analysis approach, (2) an assembly-based Nanopore  
11 approach, and (3) an Illumina Pilon-corrected approach. The run statistics and the whole  
12 genome assembly parameters are summarized in the Supplemental File Run & Assembly  
13 Statistics. Sequencing data for this study were deposited in the Sequencing Read Archive  
14 (SRA; BioProject number: PRJNA496461), and genome assemblies submitted to NCBI.

15

16 **Nanopore real-time approach.** For the real-time analysis approach, the Oxford Nanopore  
17 Technology “What’s In My Pot” (WIMP)(1) and Metrichor’s Antimicrobial Resistance Mapping  
18 Application (ARMA) (2) real-time analysis tools were run in parallel to both sequencing and  
19 base-calling. WIMP uses a customized pipeline applying the Centrifuge metagenomic classifier  
20 to the sequencing reads. ARMA aligns sequencing reads to the Comprehensive Antimicrobial  
21 Database (CARD)(3), identifying antimicrobial resistance (AMR) gene hits.

22

23 **Nanopore assembly-based approach.** For the assembly-based approach, Albacore v2.1.3  
24 was used to base-call. Raw data were corrected, trimmed, and assembled using Canu v1.6(4)  
25 using default parameters. Genome size was assumed to be 5.3Mb. For isolates that did not  
26 assemble under default parameters, either read quality restrictions were relaxed or minimum

27 overlap requirements were shortened as suggested by the software documentation. Assembled  
28 contigs were screened for resistance genes using Abricate  
29 (<https://github.com/tseemann/abricate>), a tool that uses alignment to search for resistance gene  
30 sequences from several database including ResFinder, CARD, ARG-ANNOT, and the NCMI  
31 AMR Reference Gene Database. ResFinder results were evaluated in this study(5). In a  
32 separate experiment, we were able to build high quality genomes from nanopore electrical data  
33 in under 6 hours using a machine with 36 cores and 72GB RAM. Thirteen random blocks of  
34 4000 reads were sampled and taken through basecalling, assembly and polishing.  
35 Conservatively, it takes at most an hour to reach 52,000 reads on a typical run.

36

37 **Illumina sequencing.** WGS was also conducted using Illumina MiSeq short-read sequencing to  
38 increase assembly accuracy (Illumina, San Diego, California). A drawback with Illumina  
39 sequencing is the turn-around time as sequencing alone requires between 19-24 hours for 300  
40 cycles. As the ultimate goal would be to use Nanopore sequencing alone for both resistance  
41 gene and chromosomal mutation identification, in the current analysis, the Pilon-corrected  
42 assemblies were not meant to supplant or supplement Nanopore sequencing but rather to serve  
43 as a reference standard to determine the accuracy of Nanopore sequencing results.

44 Approximately 100-500 ng of gDNA was used to prepare sequencing libraries using the Nextera  
45 Flex Kit. The each Illumina library was then sequenced using both v2 2x150 and v3 2x75  
46 reagents on an Illumina Miseq. These reads were used to correct the more error prone  
47 Nanopore assembly with the Pilon v1.22 software package in conjunction with the short-read  
48 aligner Bowtie2 v2.2.6.

49

50 **Analysis for Detection of Chromosomal Mutations.** Both Nanopolished Nanopore  
51 assemblies and hybrid Illumina-corrected Nanopore assemblies were further evaluated for  
52 chromosomal mutations presumed to confer resistance. These included truncations in the outer

53 membrane proteins OmpK35 and OmpK36 as a consequence of premature stop codons  
54 resulting in carbapenem resistance and *gyrA* (DNA gyrase; nucleotide positions 247-249 & 259-  
55 261) and *parC* (topoisomerase IV; nucleotide positions 238-240 & 250-252) point mutations that  
56 encoded amino acid changes resulting in fluoroquinolone resistance. Additionally, mutations in  
57 *mgrB*, the negative regulator of the two-component regulatory system that renders polymyxins  
58 ineffective were evaluated.

59

60 Coding sequences encompassing chromosomal mutations of interest were extracted from the  
61 genome of the *K. pneumoniae* ATCC 13883 strain and used to align with genomic assemblies  
62 using minimap2 (6). Code written in C++ was developed for parsing alignment data and  
63 mutations, evaluating their impact on amino acid translation based on resulting codon  
64 changes(7). Substitutions causing synonymous codons were reported as such, and frameshift  
65 mutations were followed downstream to report premature stop codons. Additionally, the  
66 program analyzed DNA sequences surrounding mutation sites looking for homopolymers or  
67 methylation motifs specific for *K. pneumoniae* as indicators of potential sequencing issues  
68 rather than mutations in the genome.

69

70 **Predicted correlations between resistance genes/mutations and AST results.** Predictions  
71 of resistance were performed without reference to phenotypic data. The correlation of resistance  
72 genes and sequence variants with anticipated AST results for the evaluated antibiotics was  
73 determined based on reference gene databases and the published literature(8-26). For  
74 associations for which ambiguity existed, the following rules were established *a priori*:

- 75 • SHV 2be extended-spectrum  $\beta$ -lactamase enzymes were assumed to inactivate  
76 ceftriaxone and cefepime if they contained G238S or E240K mutations(19, 27)
- 77 • The relative contributions of porins OmpK35 and/or OmpK36 truncations to  $\beta$ -lactam  
78 resistance have not been well established(13, 28-32). There appears to be consensus

79 that when premature stop codons are present for both, in conjunction with ESBLs or  
80 AmpC cephalosporinases, carbapenem resistance is likely.

81 • Aminoglycoside modifying enzymes (AMEs)- including aminoglycoside N-  
82 acetyltransferases [AACs], aminoglycoside O-nucleotidyltransferases [ANTs], or  
83 aminoglycoside O-phosphotransferases [APHs] are anticipated to confer resistance to  
84 gentamicin and tobramycin (17). Correlations between the number of different enzymes  
85 produced and the association with aminoglycoside resistance are not well defined. After  
86 exploratory analysis (Table 1), we predicted that when four or more AMEs were present,  
87 gentamicin and tobramycin resistance was likely.

88 • The AME *aac(6')Ib-cr* was also evaluated for its contribution to ciprofloxacin  
89 resistance(17).

90 • Ribosomal RNA methyltransferases (*armA*, *rmtA*, *rmtB*, *rmtC*, *rmtD*, or *rmtE*) are  
91 expected to confer resistance to amikacin, gentamicin, and tobramycin (18).

92 • Plasmid-encoded quinolone resistance genes *qnrB*, *qnrS*, *aac(6')Ib-cr* and *oqxAB*  
93 (chromosomally encoded) were predicted to cause low-level fluoroquinolone resistance,  
94 but not frank resistance (16, 33, 34).

95 Single *gyrA* or *parC* mutations were not predicted to cause fluoroquinolone resistance but two-  
96 step *gyrA* mutations or the presence of both *gyrA* and *parC* mutations translating to amino acid  
97 changes were expected to result in fluoroquinolone resistance (33, 34).

98

99

100

101

102

103

104 **References**

- 105 1. **Juul S IF, Hurst A, Dai X, Wright A, Kulesha E, Perrett R, Turner DJ.** 2016. What's in my pot?  
106 Real-time species identification on the MinION. <https://doi.org/10.1101/030742>. Accessed  
107 October 17th, 2018.
- 108 2. **Real-time detection of antibiotic-resistance genes** [https://publication-](https://publication-admin.nanoporetech/2016/05/18/real-time-detection-of-antibiotic-resistance-genes-poster/)  
109 [admin.nanoporetech/2016/05/18/real-time-detection-of-antibiotic-resistance-genes-poster/](https://publication-admin.nanoporetech/2016/05/18/real-time-detection-of-antibiotic-resistance-genes-poster/).  
110 Accessed October 17th.
- 111 3. **Jia B, Raphenya AR, Alcock B, Waglechner N, Guo P, Tsang KK, Lago BA, Dave BM, Pereira S,**  
112 **Sharma AN, Doshi S, Courtot M, Lo R, Williams LE, Frye JG, Elsayegh T, Sardar D, Westman EL,**  
113 **Pawlowski AC, Johnson TA, Brinkman FS, Wright GD, McArthur AG.** 2017. CARD 2017:  
114 expansion and model-centric curation of the comprehensive antibiotic resistance database.  
115 *Nucleic Acids Res* **45**:D566-D573.
- 116 4. **Koren S, Walenz BP, Berlin K, Miller JR, Bergman NH, Phillippy AM.** 2017. Canu: scalable and  
117 accurate long-read assembly via adaptive k-mer weighting and repeat separation. *Genome Res*  
118 **27**:722-736.
- 119 5. **Zankari E, Hasman H, Cosentino S, Vestergaard M, Rasmussen S, Lund O, Aarestrup FM, Larsen**  
120 **MV.** 2012. Identification of acquired antimicrobial resistance genes. *J Antimicrob Chemother*  
121 **67**:2640-2644.
- 122 6. **Li H.** 2018. Minimap2: pairwise alignment for nucleotide sequences. *Bioinformatics*  
123 doi:10.1093/bioinformatics/bty191.
- 124 7. **Pairwise alignments of DNA sequences.** <https://github.com/gperte/pwasm> Accessed October  
125 **17th.**
- 126 8. **Bush K, Jacoby GA.** 2010. Updated functional classification of beta-lactamases. *Antimicrob*  
127 *Agents Chemother* **54**:969-976.
- 128 9. **Bush K, Jacoby GA, Medeiros AA.** 1995. A functional classification scheme for beta-lactamases  
129 and its correlation with molecular structure. *Antimicrob Agents Chemother* **39**:1211-1233.
- 130 10. **Jacoby GA.** 2009. AmpC beta-lactamases. *Clin Microbiol Rev* **22**:161-182, Table of Contents.
- 131 11. **Naas T, Poirel L, Nordmann P.** 2008. Minor extended-spectrum beta-lactamases. *Clin Microbiol*  
132 *Infect* **14 Suppl 1**:42-52.
- 133 12. **Evans BA, Amyes SG.** 2014. OXA beta-lactamases. *Clin Microbiol Rev* **27**:241-263.
- 134 13. **Zhang Y, Jiang X, Wang Y, Li G, Tian Y, Liu H, Ai F, Ma Y, Wang B, Ruan F, Rajakumar K.** 2014.  
135 Contribution of beta-lactamases and porin proteins OmpK35 and OmpK36 to carbapenem  
136 resistance in clinical isolates of KPC-2-producing *Klebsiella pneumoniae*. *Antimicrob Agents*  
137 *Chemother* **58**:1214-1217.
- 138 14. **Chen FJ, Lauderdale TL, Ho M, Lo HJ.** 2003. The roles of mutations in *gyrA*, *parC*, and *ompK35* in  
139 fluoroquinolone resistance in *Klebsiella pneumoniae*. *Microb Drug Resist* **9**:265-271.
- 140 15. **Vetting MW, Hegde SS, Wang M, Jacoby GA, Hooper DC, Blanchard JS.** 2011. Structure of  
141 QnrB1, a plasmid-mediated fluoroquinolone resistance factor. *J Biol Chem* **286**:25265-25273.
- 142 16. **Kim HB, Wang M, Park CH, Kim EC, Jacoby GA, Hooper DC.** 2009. *oqxAB* encoding a multidrug  
143 efflux pump in human clinical isolates of Enterobacteriaceae. *Antimicrob Agents Chemother*  
144 **53**:3582-3584.
- 145 17. **Ramirez MS, Tolmasky ME.** 2010. Aminoglycoside modifying enzymes. *Drug Resist Updat*  
146 **13**:151-171.
- 147 18. **Galimand M, Courvalin P, Lambert T.** 2012. RmtF, a new member of the aminoglycoside  
148 resistance 16S rRNA N7 G1405 methyltransferase family. *Antimicrob Agents Chemother*  
149 **56**:3960-3962.

- 150 19. **Liakopoulos A, Mevius D, Ceccarelli D.** 2016. A Review of SHV Extended-Spectrum beta-  
151 Lactamases: Neglected Yet Ubiquitous. *Front Microbiol* **7**:1374.
- 152 20. **B-Lactamase Classification and Amino Acid Sequences for TEM S, and OXA Extended-Spectrum**  
153 **and Inhibitor Resistant Enzymes.** <http://www.lahey.org/studies/> Accessed October 17th,  
154 **2018.**
- 155 21. **Tarnberg M, Nilsson LE, Monstein HJ.** 2009. Molecular identification of (bla)SHV, (bla)LEN and  
156 (bla)OKP beta-lactamase genes in *Klebsiella pneumoniae* by bi-directional sequencing of  
157 universal SP6- and T7-sequence-tagged (bla)SHV-PCR amplicons. *Mol Cell Probes* **23**:195-200.
- 158 22. **Bonnet R.** 2004. Growing group of extended-spectrum beta-lactamases: the CTX-M enzymes.  
159 *Antimicrob Agents Chemother* **48**:1-14.
- 160 23. **Fevre C, Passet V, Weill FX, Grimont PA, Brisse S.** 2005. Variants of the *Klebsiella pneumoniae*  
161 OKP chromosomal beta-lactamase are divided into two main groups, OKP-A and OKP-B.  
162 *Antimicrob Agents Chemother* **49**:5149-5152.
- 163 24. **Roberts MC.** 2005. Update on acquired tetracycline resistance genes. *FEMS Microbiol Lett*  
164 **245**:195-203.
- 165 25. **Fu Y, Zhang W, Wang H, Zhao S, Chen Y, Meng F, Zhang Y, Xu H, Chen X, Zhang F.** 2013. Specific  
166 patterns of *gyrA* mutations determine the resistance difference to ciprofloxacin and levofloxacin  
167 in *Klebsiella pneumoniae* and *Escherichia coli*. *BMC Infect Dis* **13**:8.
- 168 26. **Poirel L, Naas T, Nordmann P.** 2010. Diversity, epidemiology, and genetics of class D beta-  
169 lactamases. *Antimicrob Agents Chemother* **54**:24-38.
- 170 27. **Howard C, van Daal A, Kelly G, Schooneveldt J, Nimmo G, Giffard PM.** 2002. Identification and  
171 minisequencing-based discrimination of SHV beta-lactamases in nosocomial infection-associated  
172 *Klebsiella pneumoniae* in Brisbane, Australia. *Antimicrob Agents Chemother* **46**:659-664.
- 173 28. **Shelburne SA, Kim J, Munita JM, Sahasrabhojane P, Shields RK, Press EG, Li X, Arias CA,**  
174 **Cantarel B, Jiang Y, Kim MS, Aitken SL, Greenberg DE.** 2017. Whole-Genome Sequencing  
175 Accurately Identifies Resistance to Extended-Spectrum beta-Lactams for Major Gram-Negative  
176 Bacterial Pathogens. *Clin Infect Dis* **65**:738-745.
- 177 29. **Tsai YK, Fung CP, Lin JC, Chen JH, Chang FY, Chen TL, Siu LK.** 2011. *Klebsiella pneumoniae* outer  
178 membrane porins OmpK35 and OmpK36 play roles in both antimicrobial resistance and  
179 virulence. *Antimicrob Agents Chemother* **55**:1485-1493.
- 180 30. **Landman D, Bratu S, Quale J.** 2009. Contribution of OmpK36 to carbapenem susceptibility in  
181 KPC-producing *Klebsiella pneumoniae*. *J Med Microbiol* **58**:1303-1308.
- 182 31. **Jiang X, Espedido BA, Partridge SR, Thomas LC, Wang F, Iredell JR.** 2009. Paradoxical effect of  
183 *Klebsiella pneumoniae* OmpK36 porin deficiency. *Pathology* **41**:388-392.
- 184 32. **Domenech-Sanchez A, Martinez-Martinez L, Hernandez-Alles S, del Carmen Conejo M, Pascual**  
185 **A, Tomas JM, Alberti S, Benedi VJ.** 2003. Role of *Klebsiella pneumoniae* OmpK35 porin in  
186 antimicrobial resistance. *Antimicrob Agents Chemother* **47**:3332-3335.
- 187 33. **Ruiz J, Pons MJ, Gomes C.** 2012. Transferable mechanisms of quinolone resistance. *Int J*  
188 *Antimicrob Agents* **40**:196-203.
- 189 34. **Jacoby GA.** 2005. Mechanisms of resistance to quinolones. *Clin Infect Dis* **41 Suppl 2**:S120-126.

190

191

192

193

194













|    |                                                                                                                                                                     |                                                                                                                                                                                                                                |       |       |       |       |       |       |       |       |       |       |       |       |       |       |       |       |       |       |       |       |       |
|----|---------------------------------------------------------------------------------------------------------------------------------------------------------------------|--------------------------------------------------------------------------------------------------------------------------------------------------------------------------------------------------------------------------------|-------|-------|-------|-------|-------|-------|-------|-------|-------|-------|-------|-------|-------|-------|-------|-------|-------|-------|-------|-------|-------|
| 30 | <i>bla<sub>SHV</sub></i> [45];<br><i>bla<sub>TEM</sub></i> [38];<br><i>bla<sub>OXA</sub></i> [6]; <i>bla<sub>KPC</sub></i> [9];<br><i>aac</i> [2]; <i>aadA</i> [5]; | <i>oqxA</i> ; <i>oqxB</i> ;<br><i>qnrS1</i> ; two-step<br><i>gyrA</i> mutation;<br><i>parC</i> mutation;<br><i>phoP</i> mutation;<br>OmpK36<br>truncation;<br><i>aph(3')-Ia</i> ; <i>sul1</i> ;<br><i>sul3</i> ; <i>dfrA12</i> | Red   | Green | Green | Green | Red   | Green | Red   | Green | Green | Green | Red   |       |
| 31 | <i>bla<sub>CTX-M</sub></i> [19];<br><i>bla<sub>TEM</sub></i> [22];<br><i>bla<sub>SHV</sub></i> [36]; <i>qnr</i> [11]                                                | <i>oqxA</i> ; <i>oqxB</i> ;<br>OmpK36<br>truncation;<br><i>aph(6)-Id</i> ;<br><i>aph(3'')-Ib</i> ; <i>sul2</i> ;<br><i>dfrA14</i>                                                                                              | Green | Green | Red   | Red   | Red   | Red   | Green | Red   |
| 32 | <i>bla<sub>OXA</sub></i> [3];<br><i>bla<sub>SHV</sub></i> [60]; <i>bla<sub>CTX-M</sub></i> [23]; <i>bla<sub>TEM</sub></i> [20];<br><i>qnr</i> [12]; <i>aac</i> [2]  | <i>oqxA</i> ; <i>oqxB</i> ;<br><i>tet(A)</i> ; <i>aph(6)-Id</i> ;<br><i>aph(3'')-Ib</i> ;<br><i>sul2</i> ; <i>dfrA14</i> ;<br>OmpK36<br>truncation                                                                             | Green | Red   | Red   | Red   | Red   | Red   | Green | Green | Green | Green | Green | Green | Red   | Green | Red   | Green | Green | Red   | Green | Green | Red   |
| 33 | <i>bla<sub>SHV</sub></i> [25]( <i>bla<sub>LEN</sub></i> [25]);<br><i>oqxA</i> [1];<br><i>oqxB</i> [1]; <i>sul2</i> [1];<br><i>dfrA14</i> [1]                        | OmpK36<br>truncation;<br><i>tet(D)</i>                                                                                                                                                                                         | Green | Red   | Red   | Red   |
| 34 | <i>bla<sub>SHV</sub></i> [23];<br><i>oqxA</i> [1]; <i>oqxB</i> [1]                                                                                                  | OmpK36<br>truncation                                                                                                                                                                                                           | Green |
| 35 | <i>bla<sub>SHV</sub></i> [24];<br><i>oqxA</i> [1]; <i>oqxB</i> [1]                                                                                                  | OmpK36<br>truncation                                                                                                                                                                                                           | Green |
| 36 | <i>bla<sub>SHV</sub></i> [22];<br><i>oqxA</i> [1]; <i>oqxB</i> [1]                                                                                                  | <i>ant(2'')-Ia</i> ;<br>OmpK36<br>truncation                                                                                                                                                                                   | Green |
| 37 | <i>bla<sub>TEM</sub></i> [41];<br><i>bla<sub>KPC</sub></i> [8];<br><i>bla<sub>SHV</sub></i> [85]; <i>ant</i> [1]                                                    | <i>qnrS1</i> ; OmpK36<br>truncation                                                                                                                                                                                            | Red   | Green | Green | Green | Red   | Green | Red   | Green | Green | Green | Green |       |
| 38 | <i>bla<sub>OKP</sub></i> [9];<br><i>bla<sub>TEM</sub></i> [12];<br><i>bla<sub>SHV</sub></i> [1]; <i>oqxA</i> ;<br><i>oqxB</i> ; <i>sul</i> ; <i>dfr</i>             | <i>tet(D)</i> ; OmpK36<br>truncation                                                                                                                                                                                           | Green | Red   | Red   | Red   |



**Supplemental Table 2:** Anticipated antibiotic susceptibility results for 40 *Klebsiella pneumoniae* isolates based on resistance determinants detected by Nanopore sequencing technology with assembly; first column for each antibiotic indicates presumed activity and second column for each antibiotic indicates *in vitro* activity based on broth microdilution results with green indicating susceptible and red indicating intermediate or resistant; number on bottom represents percent agreement between presumed and *in vitro* activity

| # | Resistance determinants identified with Nanopore sequencing with assembly                                                                                                                                                                                                                                                                                                                                                                                                                                                                  | Missing resistance determinants based on pilon-corrected Illumina data | Piperacillin-tazobactam | Ceftriaxone | Cefepime | Ertapenem | Meropenem | Amikacin | Gentamicin | Ciprofloxacin | Colistin | Doxycycline | TMP-SMX |
|---|--------------------------------------------------------------------------------------------------------------------------------------------------------------------------------------------------------------------------------------------------------------------------------------------------------------------------------------------------------------------------------------------------------------------------------------------------------------------------------------------------------------------------------------------|------------------------------------------------------------------------|-------------------------|-------------|----------|-----------|-----------|----------|------------|---------------|----------|-------------|---------|
| 1 | <i>bla</i> <sub>SHV-1</sub> ; <i>bla</i> <sub>CTX-M-15</sub> ; <i>bla</i> <sub>OXA-1</sub> ; <i>bla</i> <sub>KPC-3</sub> ; OmpK36 truncation; <i>qnrS1</i> ; <i>oqxA</i> ; <i>oqxB</i> ; two-step <i>gyrA</i> mutations; <i>aac(6')-Ib-cr</i> ; <i>aadA2</i> ; <i>sul1</i> ; <i>dfrA12</i>                                                                                                                                                                                                                                                 | None                                                                   | Red                     | Red         | Red      | Red       | Red       | Green    | Green      | Red           | Green    | Red         | Red     |
| 2 | <i>bla</i> <sub>SHV-11</sub> ; <i>bla</i> <sub>CTX-M-15</sub> ; <i>bla</i> <sub>OXA-1</sub> ; <i>bla</i> <sub>TEM-1</sub> ; <i>bla</i> <sub>KPC-2</sub> ; OmpK35 and OmpK36 truncation; <i>qnrB1</i> ; <i>oqxA</i> ; <i>oqxB</i> ; one-step <i>gyrA</i> mutation; <i>parC</i> mutation; <i>tet(B)</i> ; <i>aadA2</i> ; <i>aph(3')-Ia</i> ; <i>aac(3)-IIId</i> ; <i>aac(6')-Ib-cr</i> ; <i>aadA2</i> ; <i>aac(3)-IIa</i> ; <i>aph(6'')-Id</i> ; <i>aaA1</i> ; <i>aac(6')-Ib</i> ; <i>sul1</i> ; <i>sul2</i> ; <i>dfrA12</i> ; <i>dfrA30</i> | None                                                                   | Red                     | Red         | Red      | Red       | Red       | Green    | Red        | Red           | Green    | Red         | Red     |
| 3 | <i>bla</i> <sub>SHV-11</sub> ; <i>oqxA</i> ; <i>oqxB</i> ; OmpK36 truncation                                                                                                                                                                                                                                                                                                                                                                                                                                                               | None                                                                   | Green                   | Red         | Green    | Green     | Red       | Green    | Green      | Green         | Green    | Red         | Green   |
| 4 | <i>bla</i> <sub>SHV-11</sub> ; <i>bla</i> <sub>TEM-1</sub> ; <i>bla</i> <sub>KPC-3</sub> ; OmpK36 truncation; <i>oqxA</i> ; <i>oqxB</i> ; one-step <i>gyrA</i>                                                                                                                                                                                                                                                                                                                                                                             | None                                                                   | Red                     | Red         | Red      | Red       | Red       | Green    | Green      | Red           | Green    | Green       | Green   |

















**Supplemental Table 3:** Anticipated antibiotic susceptibility results for 40 *Klebsiella pneumoniae* isolates based on resistance determinants detected by Nanopore sequencing technology with assembly and Pilon-corrected Illumina data; first column for each antibiotic indicates presumed activity and second column for each antibiotic indicates *in vitro* activity based on broth microdilution results with green indicating susceptible and red indicating non-susceptible; number on bottom represents percent agreement between presumed and *in vitro* activity

| # | Resistance mechanisms identified                                                                                                                                                                                                                                                                                                                                                                                                                                                                                                          | Piperacillin-tazobactam | Ceftriaxone | Cefepime | Ertapenem | Meropenem | Amikacin | Gentamicin | Ciprofloxacin | Colistin | Doxycycline | TMP-SMX |
|---|-------------------------------------------------------------------------------------------------------------------------------------------------------------------------------------------------------------------------------------------------------------------------------------------------------------------------------------------------------------------------------------------------------------------------------------------------------------------------------------------------------------------------------------------|-------------------------|-------------|----------|-----------|-----------|----------|------------|---------------|----------|-------------|---------|
| 1 | <i>bla</i> <sub>SHV-1</sub> ; <i>bla</i> <sub>CTX-M-15</sub> ; <i>bla</i> <sub>OXA-1</sub> ; <i>bla</i> <sub>KPC-3</sub> ; OmpK36 truncation; <i>qnrS1</i> ; <i>oqxA</i> ; <i>oqxB</i> ; two-step <i>gyrA</i> mutations; <i>aac(6')-Ib-cr</i> ; <i>aadA2</i> ; <i>sul1</i> ; <i>dfrA12</i>                                                                                                                                                                                                                                                | Red                     | Red         | Red      | Red       | Red       | Green    | Green      | Red           | Red      | Green       | Red     |
| 2 | <i>bla</i> <sub>SHV-11</sub> ; <i>bla</i> <sub>CTX-M-15</sub> ; <i>bla</i> <sub>OXA-1</sub> ; <i>bla</i> <sub>TEM-1</sub> ; <i>bla</i> <sub>KPC-2</sub> ; OmpK35 and OmpK36 truncation; <i>qnrB1</i> ; <i>oqxA</i> ; <i>oqxB</i> ; one-step <i>gyrA</i> mutation; <i>parC</i> mutation; <i>tet(B)</i> ; <i>aadA2</i> ; <i>aph(3')-Ia</i> ; <i>aac(3)-IIa</i> ; <i>aac(6')-Ib-cr</i> ; <i>aadA2</i> ; <i>aac(3)-IIa</i> ; <i>aph(6'')-Id</i> ; <i>aaA1</i> ; <i>aac(6')-Ib</i> ; <i>sul1</i> ; <i>sul2</i> ; <i>dfrA12</i> ; <i>dfrA30</i> | Red                     | Red         | Red      | Red       | Red       | Green    | Red        | Red           | Red      | Green       | Red     |
| 3 | <i>bla</i> <sub>SHV-11</sub> ; <i>oqxA</i> ; <i>oqxB</i> ; OmpK36 truncation                                                                                                                                                                                                                                                                                                                                                                                                                                                              | Green                   | Red         | Green    | Red       | Green     | Green    | Green      | Green         | Green    | Red         | Green   |
| 4 | <i>bla</i> <sub>SHV-11</sub> ; <i>bla</i> <sub>TEM-1</sub> ; <i>bla</i> <sub>KPC-3</sub> ; OmpK36 truncation; <i>oqxA</i> ; <i>oqxB</i> ; one-step <i>gyrA</i> mutation; <i>parC</i> mutation; <i>aadA2</i> ; <i>sul1</i>                                                                                                                                                                                                                                                                                                                 | Red                     | Red         | Red      | Red       | Red       | Green    | Green      | Red           | Red      | Green       | Green   |
| 5 | <i>bla</i> <sub>SHV-11</sub> ; OmpK36 truncation; <i>oqxA</i> ; <i>oqxB</i>                                                                                                                                                                                                                                                                                                                                                                                                                                                               | Green                   | Green       | Green    | Green     | Green     | Green    | Green      | Green         | Green    | Green       | Green   |
| 6 | <i>bla</i> <sub>SHV-11</sub> ; <i>bla</i> <sub>TEM-1</sub> ; <i>bla</i> <sub>OXA-9</sub> ; <i>bla</i> <sub>KPC-3</sub> ; <i>aac(6')-Ib-cr</i> ; <i>oqxA</i> ; <i>oqxB</i> ; two-step <i>gyrA</i> mutations; <i>parC</i> mutation; OmpK35 and OmpK36 truncation; <i>aph(3'')-Ib</i> ; <i>aph(6)-Id</i> ; <i>aadA1</i> ; <i>aac(6)-Ib</i> ; <i>sul2</i> ; <i>dfrA14</i>                                                                                                                                                                     | Red                     | Red         | Red      | Red       | Red       | Green    | Green      | Red           | Red      | Green       | Red     |
| 7 | <i>bla</i> <sub>OXA-2</sub> ; <i>bla</i> <sub>SHV-11</sub> ; <i>bla</i> <sub>SHV-30</sub> ; <i>bla</i> <sub>SHV-12</sub> ; <i>oqxA</i> ; <i>oqxB</i> ; <i>aac(6')-Ib-cr</i> ; two-step <i>gyrA</i> mutations; <i>parC</i> mutation; OmpK35 and OmpK36 truncation; <i>aadA2</i> ; <i>aacA4</i> ; <i>sul1</i> ; <i>dfrA12</i> ; <i>fosA</i>                                                                                                                                                                                                 | Red                     | Red         | Red      | Red       | Red       | Green    | Green      | Red           | Red      | Green       | Red     |
| 8 | <i>bla</i> <sub>OXA-1</sub> ; <i>bla</i> <sub>OXA-47</sub> ; <i>bla</i> <sub>TEM-1</sub> ; <i>bla</i> <sub>CTX-M-15</sub> ; <i>bla</i> <sub>SHV-28</sub> ; OmpK36 truncation; <i>aac(6')</i>                                                                                                                                                                                                                                                                                                                                              | Green                   | Red         | Red      | Red       | Green     | Red      | Red        | Red           | Red      | Red         | Red     |











**Supplemental Table 4:** Average time to detection of resistance genes based on the number of reads detected in minutes

| Gene <sup>1</sup>                                  | One copy (minutes)         | Ten copies (minutes)     | Forty copies (minutes)  | Fifty copies (minutes)  | One hundred copies (minutes) |
|----------------------------------------------------|----------------------------|--------------------------|-------------------------|-------------------------|------------------------------|
| <b>β-lactam genes</b>                              |                            |                          |                         |                         |                              |
| Non-ESBL TEM enzymes                               | 0.39 minutes (IQR 0.14-2)  | 13 minutes (IQR 8-16)    | 66 minutes (IQR 54-74)  | 78 minutes (IQR 71-99)  | 155 minutes (IQR 136-174)    |
| Non-ESBL OXA enzymes                               | 0.91 minutes (IQR 0.6-4.8) | 20 minutes (IQR 14-22)   | 75 minutes (IQR 55-83)  | 92 minutes (IQR 66-99)  | 163 minutes (IQR 125-177)    |
| Non-ESBL SHV enzymes                               | 0.6 minutes (IQR 0.1-1.1)  | 13 minutes (IQR 9-17)    | 57 minutes (IQR 48-69)  | 73 minutes (IQR 60-87)  | 146 minutes (IQR 129-170)    |
| ESBL SHV enzymes                                   | 1.1 minutes (IQR 0.03-1.9) | 17 copies (IQR 12-17)    | 57 minutes (IQR 52-63)  | 74 minutes (IQR 73-75)  | 125 minutes (IQR 106-139)    |
| ESBL CTX-M-type enzymes                            | 0.5 minutes (IQR 0.14-1.4) | 11 minutes (IQR 10-14)   | 50 minutes (IQR 40-66)  | 64 minutes (IQR 46-86)  | 138 minutes (IQR 102-164)    |
| ESBL OXA enzymes                                   | 0.58 minutes (IQR 0.1-1.3) | 16 minutes (IQR 0.1-0.2) | 61 minutes (IQR 55-71)  | 75 minutes (IQR 72-90)  | 165 minutes (IQR 148-184)    |
| KPC carbapenemases                                 | 0.33 minutes (IQR 0.1-1.1) | 12 minutes (IQR 7-14)    | 57 minutes (IQR 49-71)  | 74 minutes (IQR 66-90)  | 150 minutes (IQR 131-169)    |
| NDM carbapenemases                                 | 0.7 minutes (IQR 0.01-0.9) | 14 minutes (IQR 3-26)    | 50 minutes (IQR 23-116) | 64 minutes (IQR 35-173) | 153 minutes (IQR 85-489)     |
| <b>Aminoglycoside inactivating enzymes</b>         |                            |                          |                         |                         |                              |
| Aminoglycoside modifying enzymes                   | 1.0 minute (IQR 0.3-4)     | 15 minutes (IQR 9-24)    | 66 minutes (IQR 50-80)  | 82 minutes (IQR 61-99)  | 151 minutes (IQR 130-172)    |
| Ribosomal RNA methyltransferase mutations          | 0.6 minutes (IQR 0.3-0.9)  | 12 minutes (IQR 8-15)    | 55 minutes (IQR 41-69)  | 70 minutes (IQR 58-81)  | 132 minutes (IQR 116-148)    |
| <b>Tetracycline resistance genes</b>               |                            |                          |                         |                         |                              |
| <i>tet(A), tet(B), tet(D), tet(G)</i>              | 0.9 minutes (IQR 0.4-1.8)  | 11 minutes (IQR 7-18)    | 59 minutes (IQR 38-73)  | 73 minutes (IQR 54-89)  | 133 minutes (IQR 116-166)    |
| <b>Trimethoprim/sulfamethoxazole related genes</b> |                            |                          |                         |                         |                              |
| <i>dfrA</i> genes                                  | 0.2 minutes (IQR 0.02-0.5) | 14 minutes (IQR 7-16)    | 68 minutes (IQR 53-75)  | 85 minutes (IQR 69-92)  | 164 minutes (IQR 136-180)    |
| <i>sul</i> genes                                   | 0.5 minutes (IQR 0.27-1.3) | 13 minutes (IQR 7-18)    | 57 minutes (IQR 45-76)  | 80 minutes (IQR 65-96)  | 166 minutes (IQR 131-173)    |

---

<sup>1</sup>Only including genes detected in at least three isolates; ESBL: extended-spectrum beta-lactamase
